# Supplementary material for: Canagliflozin Delays Aging of HUVECs Induced by Palmitic Acid via the ROS/p38/JNK Pathway
Source: MDPI journal article supplement (doi:10.3390/antiox12040838), 2023-03-30
Supplement: s1 [file s1]

## Supplementary Material

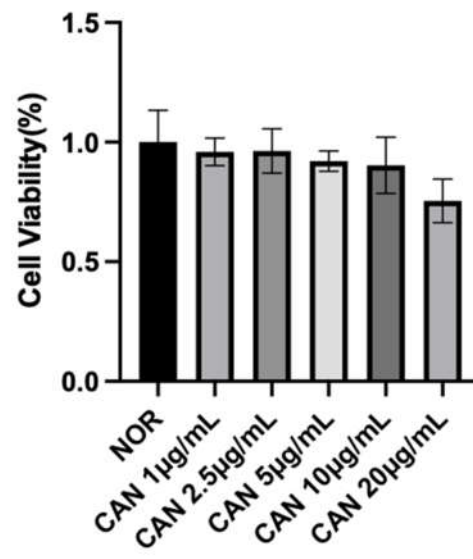

**Figure S1.** Effect of different concentrations of CAN on HUVEC cell viability was detected using MTT assay. Data are expressed as the mean  $\pm$  SD ( $n = 3$ ).
